# Supplementary material for: New Rat Model of Advanced NASH Mimicking Pathophysiological Features and Transcriptomic Signature of The Human Disease
Source: PubMed Central journal article supplement (PMC6770035; doi:10.3390/cells8091062), 2019-09-10
Supplement: cells-08-01062-s001.pdf [file cells-08-01062-s001.pdf]

# **New Rat Model of Advanced NASH Mimicking Pathophysiological Features and Transcriptomic Signature of the Human Disease**

**Raquel Maeso-Díaz, Zoe Boyer-Diaz, Juan José Lozano, Martí Ortega-Ribera, Carmen Peralta, Jaime Bosch and Jordi Gracia-Sancho**

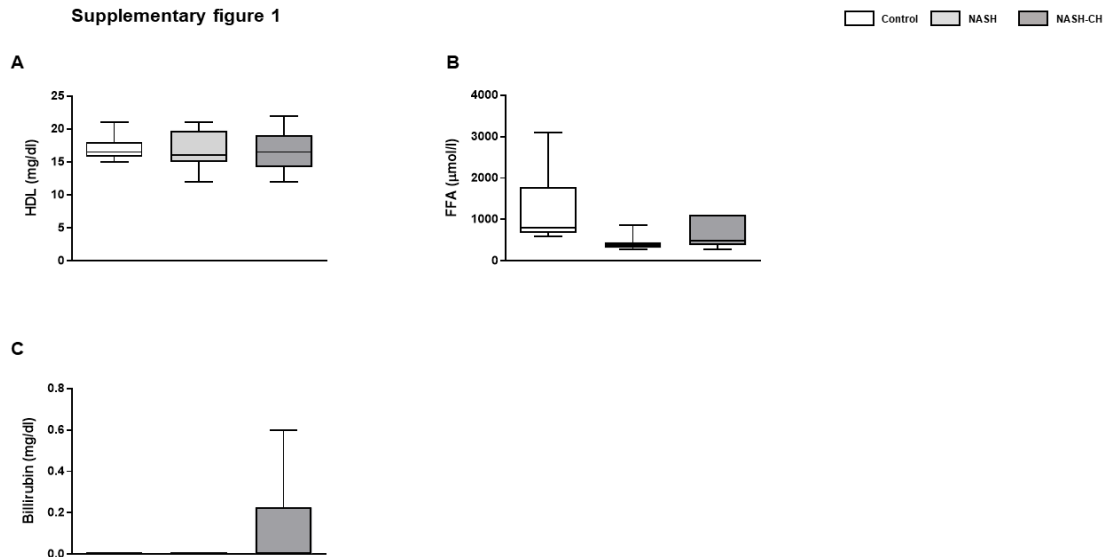

**Figure 1.** Metabolic profile of control and NASH rats. (A) HDL, (B) free fatty acids and (C) bilirubin levels were measured in plasma from control, NASH and NASH-CH rats. Results represent mean  $\pm$  S.E.M. ( $n=6$  rats per group).

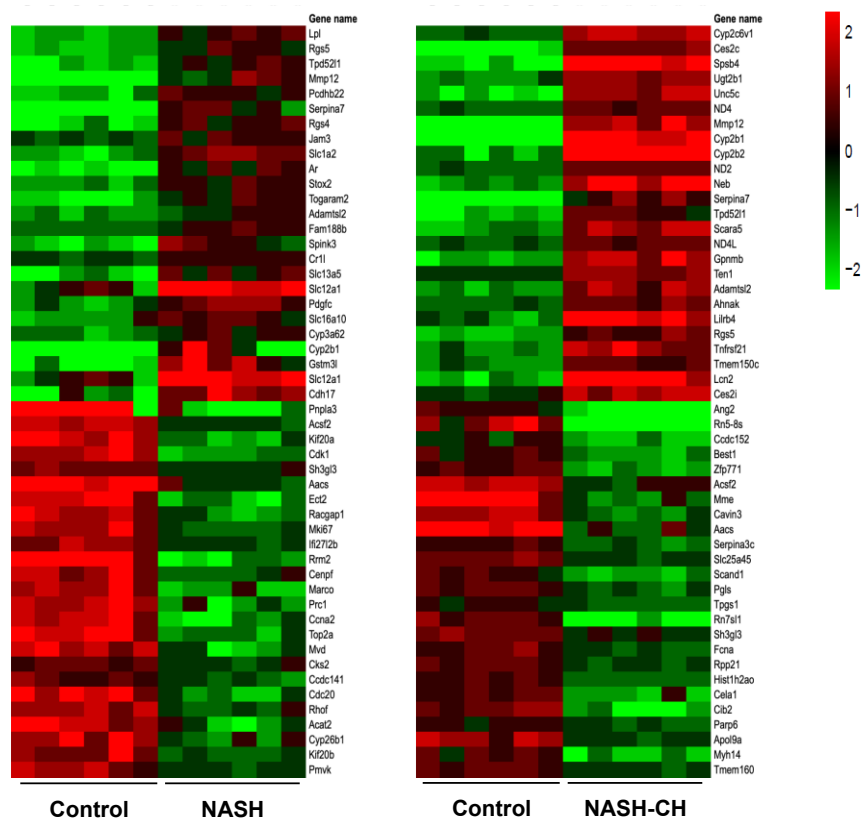

**Figure 2.** Global transcriptome profiling of the BarNa liver tissue. Representative image of top 50 dysregulated genes in control, NASH and NASH-CH livers. Fold enrichments ( $\log_2$ ) are plotted in a heatmap using red colour for transcripts that are increased or using green colour for transcripts that are decreased in NASH (*left*) or NASH-CH (*right*) rat livers. FDR < 0.05,  $n = 6$  per group.

Supplementary Figure 3

**A Commonly up-regulated gene sets between human Steatosis and rat NASH models**

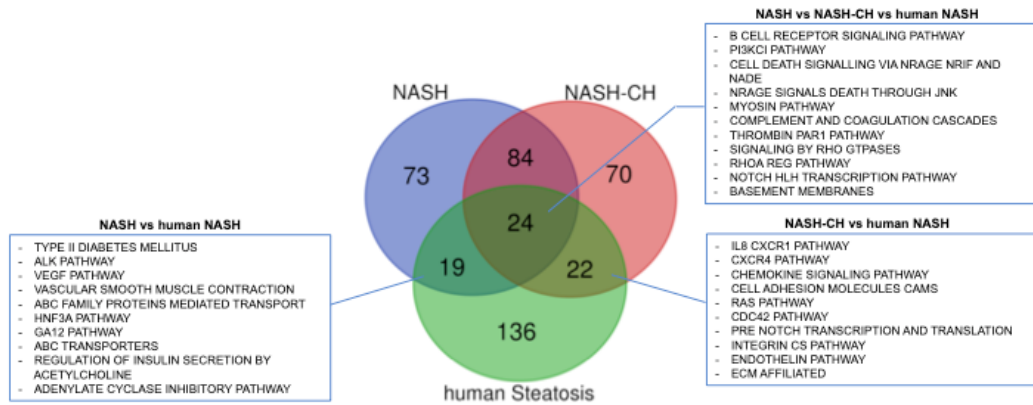

**B Commonly down-regulated gene sets between human Steatosis and rat NASH models**

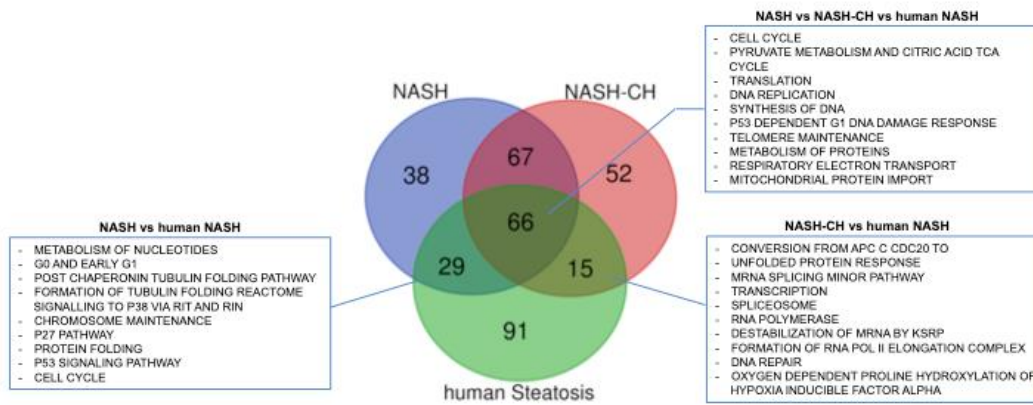

**Figure 3.** De-regulation of signaling pathways relevant for human steatosis in livers from BarNa animals. **(A)** Commonly up-regulated gene sets between human steatosis and BarNa rats. **(B)** Commonly down-regulated gene sets between human steatosis and BarNa rats. Results represent de-regulated pathways with FDR < 10% in a Venn diagram.  $n = 6$  animals per group;  $n = 12$  control human livers,  $n = 9$  human steatotic livers. Clinical characteristics of donors are described in table S1.

**Table 1.** Clinical characteristics of control patients, patients with steatosis, and patients with NASH included in the gene expression and gene enrichment analysis. RNAseq data obtained from the GSE48452.

|                    | Controls   | Steatosis     | NASH          |
|--------------------|------------|---------------|---------------|
| Age                | 51 [44–72] | 46 [37–49]    | 47 [40–50]    |
| BMI                | 24 [21–26] | 50 [47–55]    | 49 [44–56]    |
| Weight (kg)        | 67 [58–64] | 147 [121–166] | 146 [133–168] |
| Sex (% male)       | 50         | 42            | 27            |
| Diabetes (%)       | 11         | 25            | 20            |
| Fat (area in %)    | 0 [0–1]    | 43 [20–70]    | 75 [70–85]    |
| Inflammation (0-3) | 0 [0-0]    | 0 [0-0]       | 2 [1-2]       |
| Fibrosis (0-4)     | 0 [0-0]    | 0 [0-0]       | 1 [0-1]       |
| NAS (0-8)          | 0 [0-0]    | 2 [1-3]       | 5 [5-6]       |
| N                  | 12         | 9             | 17            |

**Table 2.** Top 10 commonly up-regulated gene sets comparing human NASH and BarNa rats.

| Pathway                                                | Genes                                      | Database |
|--------------------------------------------------------|--------------------------------------------|----------|
| Signaling by PDGF                                      | SRC, PRKCD, COL3A1, COL1A2, COL1A1, ...    | REACTOME |
| Developmental Biology                                  | LPL, UNC5C, ANK3, PPARA, TCF4, ...         | REACTOME |
| Focal Adhesion                                         | SRC, LAMA5, PAK1, LAMB3, TLN2, ...         | KEGG     |
| Integrin1 Pathway                                      | THBS2, ITGA9, LAMA4, LAMA5, FBN1, ...      | PID      |
| Signaling By Rho GTPases                               | ARHGEF2, ARHGAP1, ABR, OPHN1, TAGAP, ...   | REACTOME |
| Sema4d Induced Cell Migration and Growth Cone Collapse | SEMA4D                                     | REACTOME |
| Rac1 Reg Pathway                                       | ARHGEF25, ARHGEF2, ARHGEF6, ABR, RAC1, ... | PID      |
| NCAM1 Interactions                                     | NCAM1, COL6A1, AGRN, COL4A2                | REACTOME |
| Semaphorin Interactions                                | DPYSL, PAK1, SEMA4D                        | REACTOME |
| Regulation of Actin Cytoskeleton                       | ITGA9, NRAS, SLC9A1, PIK3CB, SSH2, ...     | KEGG     |

PID: pathway interaction database; KEGG: Kyoto Encyclopedia of Genes and Genomes. Data expressed at FDR < 10% ( $n = 6$  animals per group;  $n = 12$  control human livers,  $n = 17$  human NASH livers).

**Table 3.** Top 10 commonly down-regulated gene sets comparing human NASH and BarNa rats.

| Pathway                                                                                                               | Genes                                     | Database |
|-----------------------------------------------------------------------------------------------------------------------|-------------------------------------------|----------|
| Citrate Cycle TCA Cycle                                                                                               | SDHC, SDHD, SUCLA2                        | KEGG     |
| Downstream Signaling Events of B Cell Receptor BCR                                                                    | PSMD12, SKP1, RPS27A, AKT1S1              | REACTOME |
| Regulation of mRNA stability by proteins that bind Au rich elements                                                   | PSMD12, RPS271A                           | REACTOME |
| tRNA aminoacylation                                                                                                   | TARS, FARSB, GARS                         | REACTOME |
| TCA Cycle and respiratory electron transport                                                                          | SLC16A1, COX7B, COX7C, ATP5E, NDUFB1, ... | REACTOME |
| Destabilization of mRNA by AUF1 HNRP D0                                                                               | PSMD12, RPS27A                            | REACTOME |
| Nonsense mediated decay enhanced by the exon junction complex                                                         | GSPT2, RPS2, RPS15A, RBM8A, ETF1, ...     | REACTOME |
| SCDF beta TRCP mediated degradation of EMI1                                                                           | PSMD12, SKP1, RPS27A, FBX05               | REACTOME |
| Biosynthesis of the N-Glycan precursor dolichol lipid linjed to oligosaccharide LLO and transfer to a nascent protein | DPM2                                      | REACTOME |
| Influenza life cycle                                                                                                  | RPS15A, RPL31, RPL9, RPS26, RPL10, ...    | REACTOME |

PID: pathway interaction database; KEGG: Kyoto Encyclopedia of Genes and Genomes. Data expressed at FDR < 10% ( $n = 6$  animals per group;  $n = 12$  control human livers,  $n = 17$  human NASH livers).
